# Supplementary material for: Dual-responsive and super absorbing thermally cross-linked hydrogel based on methacrylate substituted polyphosphazene
Source: Royal Society of Chemistry journal article supplement (doi:10.1039/c0sm01000f), 2011-01-01
Supplement: c0sm01000f.pdf [file c0sm01000f.pdf]

Support information “*Dual-responsive and super absorbing thermo-crosslinked hydrogel based on methacrylate substituted polyphosphazene*”

1) FTIR characterization of the dry material, unannealed PMAPhos.

3157  $\text{cm}^{-1}$  – O-H stretching –COOH (dimer)

3150 and 3050  $\text{cm}^{-1}$  - C=C-H asymmetric and symmetric stretching

1723  $\text{cm}^{-1}$  - C=O stretching

1664  $\text{cm}^{-1}$  - C=C stretching

1222  $\text{cm}^{-1}$  - P=N stretching

981  $\text{cm}^{-1}$  - P-O-C stretching

2) DSC curves for the annealed hydrogel

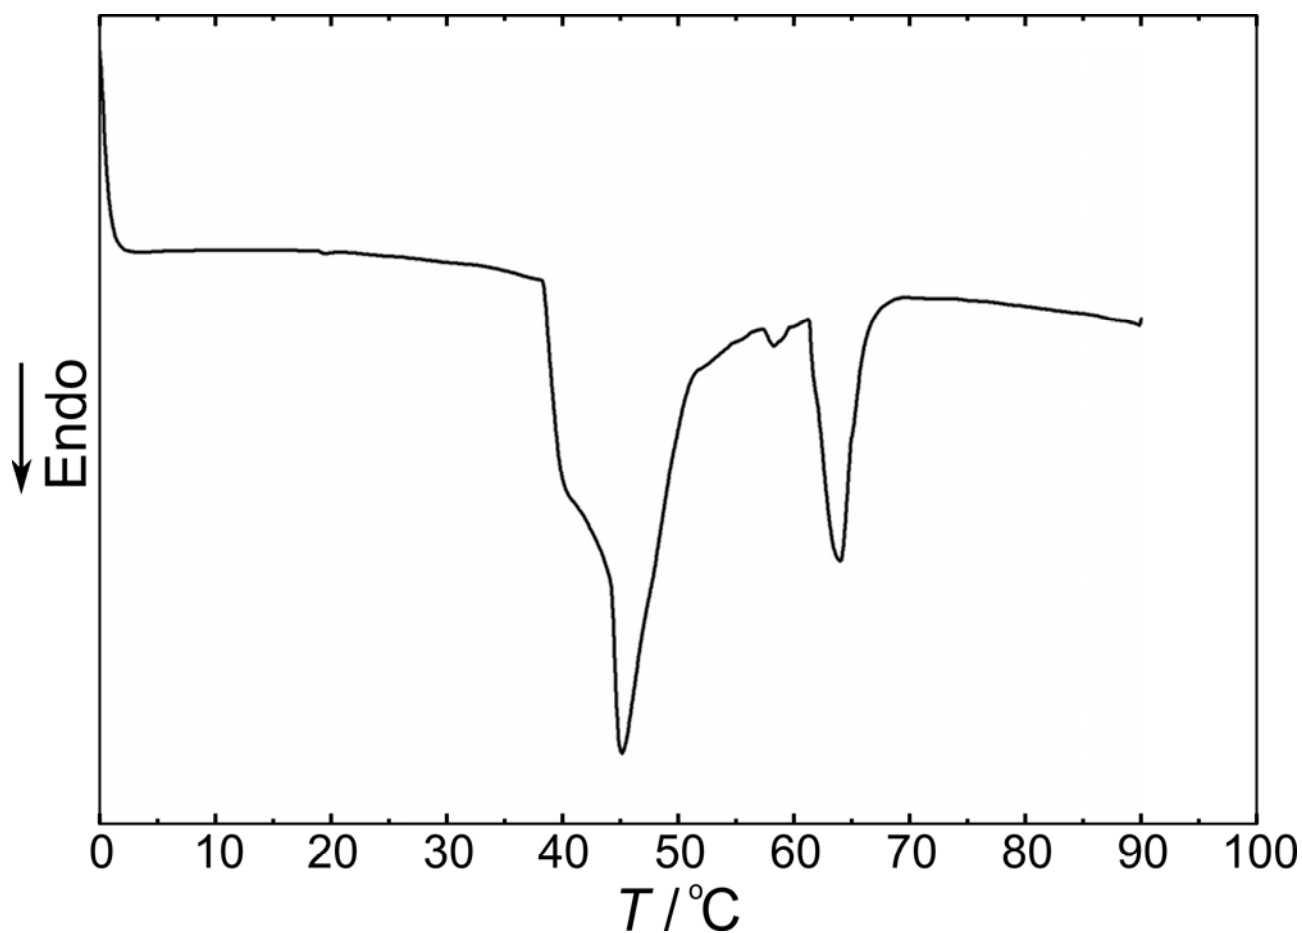

Caption : Support information Figure 1 - DSC curve for the unannealed hydrogel, under nitrogen atmosphere
